# Supplementary material
Source: PubMed Central journal article supplement (PMC6916116)
Supplement: Supp_Fig1.pdf [file Supp_Fig1.pdf]

## Supplementary Data

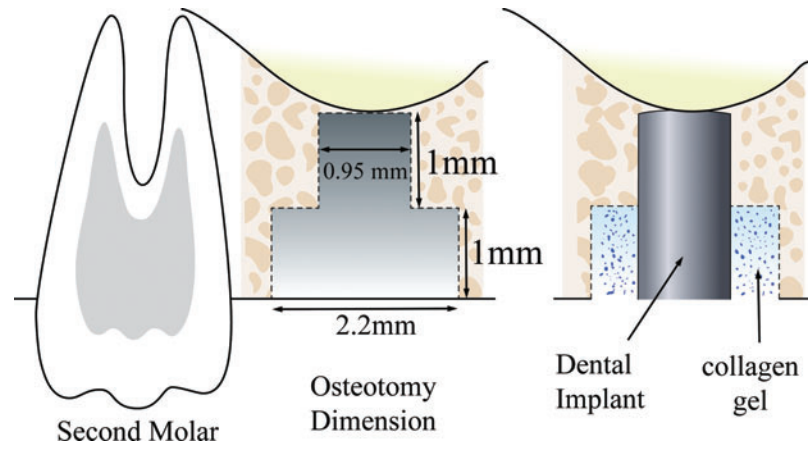

**SUPPLEMENTARY FIG. S1.** Schematic illustration of rat maxillary dental implant model. One month after first maxillary molar extraction, osteotomy was created using a customized step drill. There were two portions in the osteotomy: the apical portion was 1 mm in length  $\times$  0.95 mm in diameter; the coronal portion was 1  $\times$  2.2 mm in diameter. The dental implant was 2 mm in length  $\times$  1 mm in diameter. We have published this model before. (Chang PC, Seol YJ, Cirelli JA, et al. PDGF-B gene therapy accelerates bone engineering and oral implant osseointegration. *Gene Ther* **17**, 95, 2010.)
